# Supplementary material
Source: Springer Nature journal article supplement (https://www.springermedizin.de/resource/supplementary/13030_2010_78_MOESM2_ESM.pdf/9644690)

Test information and measurement error

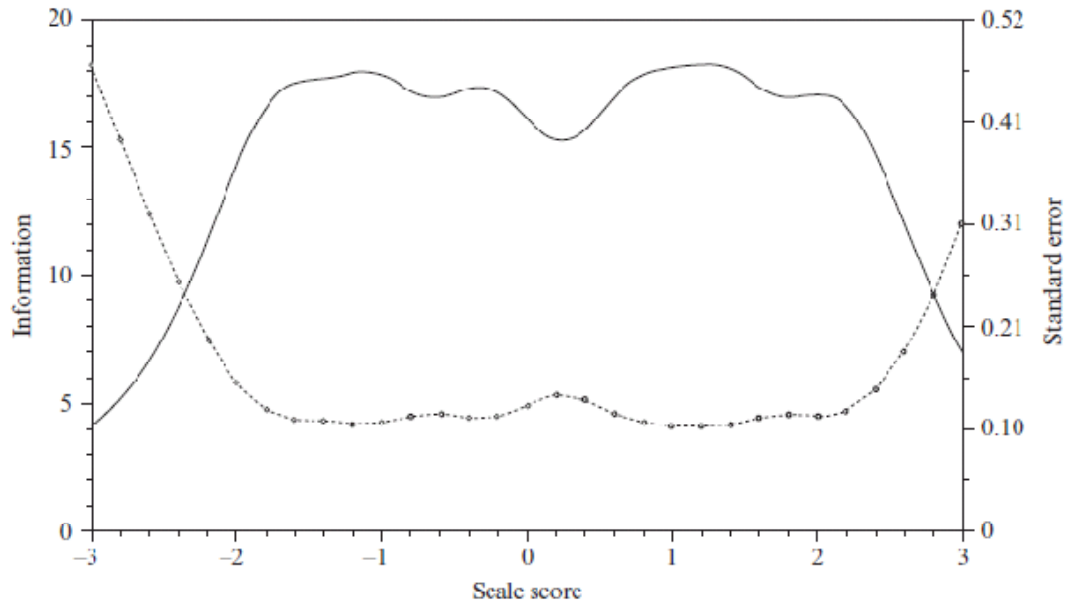

Supplement: MOESM2 [file 9644690]
